# Supplementary material for: Room temperature solution synthesis of hierarchical bow-like Cu2O with high visible light driven photocatalytic activity
Source: Royal Society of Chemistry journal article supplement (doi:10.1039/c2ra01197b), 2012-01-01
Supplement: c2ra01197b.pdf [file c2ra01197b.pdf]

## Electronic Supplementary Information

### Room temperature solution synthesis of hierarchical bows-like $\text{Cu}_2\text{O}$ with high visible-light driven photocatalytic activity

Xiangying Meng, Guohui Tian, Yajie Chen, Yang Qu, Juan Zhou, Kai Pan, Wei Zhou,  
Guoliang Zhang and Honggang Fu\*

Key Laboratory of Functional Inorganic Material Chemistry, Ministry of Education of  
the People's Republic of China, Heilongjiang University, Harbin 150080 P. R. China

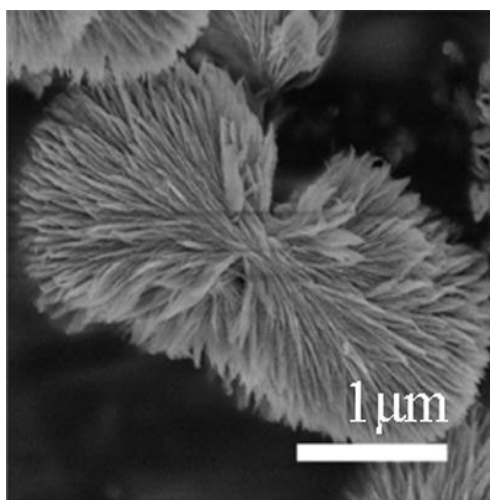

**Fig. S1** High- magnification SEM image of the hierarchical bows-like  $\text{Cu}_2\text{O}$ .

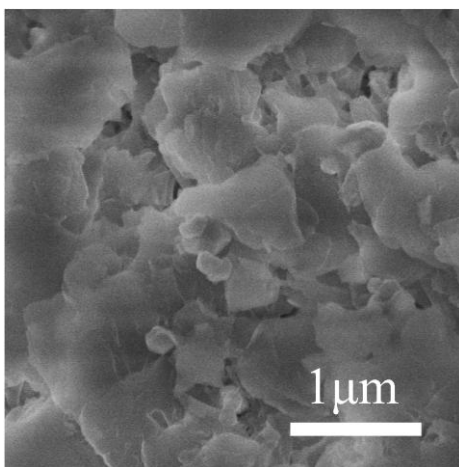

**Fig. S2** SEM images of the  $\text{Cu}_2\text{O}$  crystal in the presence of SDS (0.1 g).

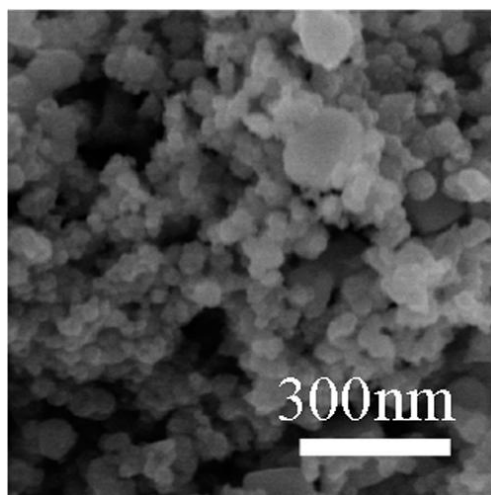

**Fig. S3** SEM images of the Cu<sub>2</sub>O crystal in the presence of CTAB (0.1 g)

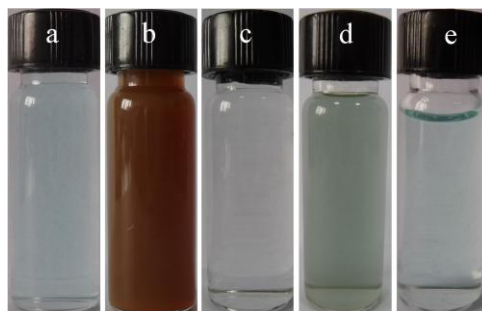

**Fig. S4** The color change of the solutions obtained at different reaction time during the formation process of hierarchical bows-like Cu<sub>2</sub>O: (a) 0 min, (b) 90 min, (c) the supernatant after centrifugation of the solution obtained at 90 min, (d) 200 min, (e) the supernatant after centrifugation of the solution obtained at 200 min.

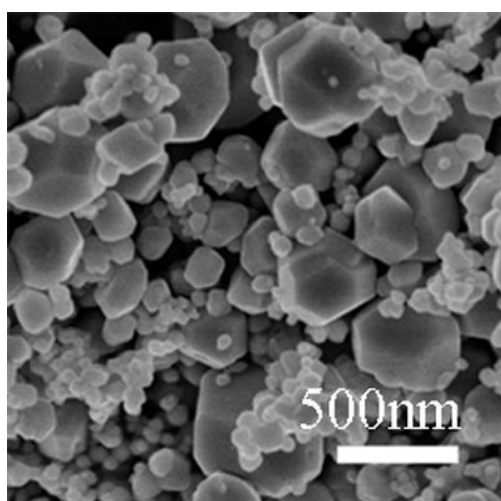

**Fig. S5** SEM image of Cu<sub>2</sub>O crystal formed under the condition of nitrogen.

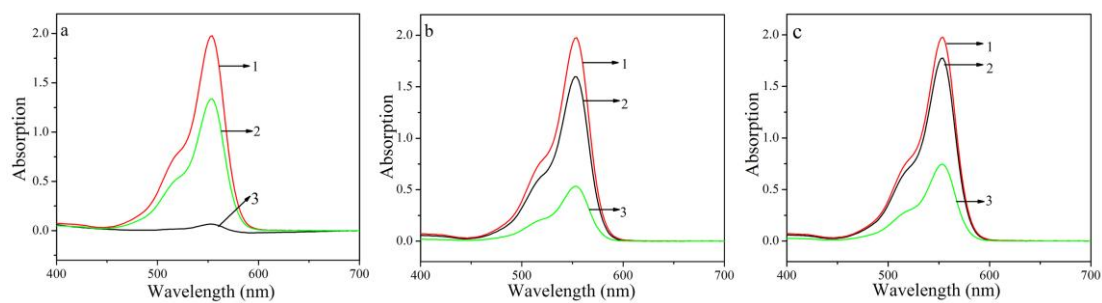

**Fig. S6** The UV-vis absorption spectra of the RhB solutions after dark adsorption and visible-light photocatalytic degradation in the presence of the different catalysts. a: bows-like Cu<sub>2</sub>O, b: nitrogen-doped anatase TiO<sub>2</sub>, c: nitrogen-doped Degussa P25. (1: Initial RhB solution, 2: After dark adsorption (30 min), 3: After 120 min photocatalytic test).

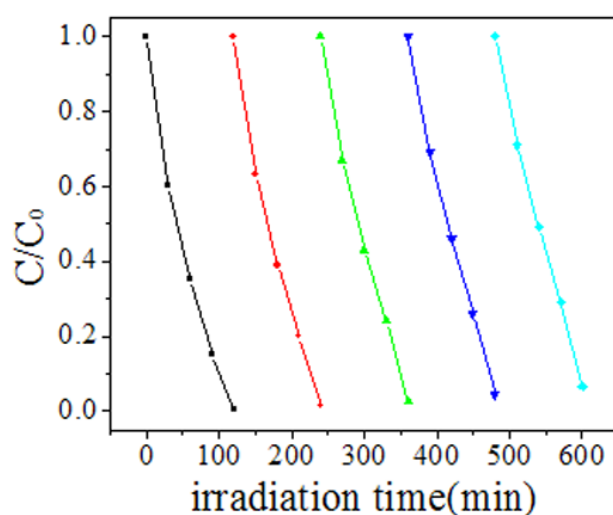

**Fig. S7** Cycling runs in the photodegradation of RhB in the presence of hierarchical bows-like Cu<sub>2</sub>O under visible light irradiation.

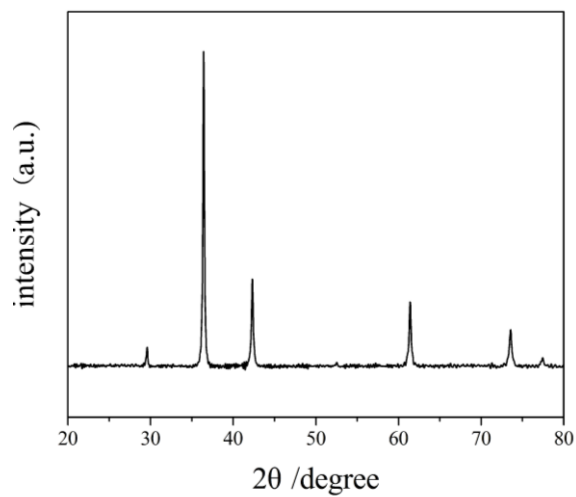

**Fig. S8** XRD patterns of the Cu<sub>2</sub>O crystal sample prepared from the solid after photocatalytic test.

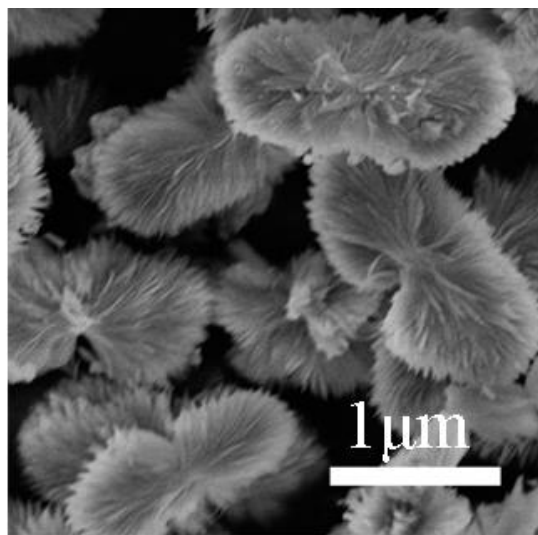

**Fig. S9** SEM image of the Cu<sub>2</sub>O crystal sample prepared from the solid after photocatalytic test.

**Table S1** The copper ions concentrations of the solutions obtained after different reaction time determined by the flame atomic absorption spectrometry (AAS, Thermo Elemental SOLAAR-M, limit of identification: 5 m g/L).

|                                         |       |       |       |       |
|-----------------------------------------|-------|-------|-------|-------|
| Reaction time<br>(min)                  | 0     | 90    | 200   | 420   |
| Copper ions<br>concentration<br>(mol/L) | 0.017 | 0.003 | 0.007 | 0.015 |

**Table S2** The RhB concentrations after dark adsorption and visible-light photocatalytic degradation in the presence of the different catalysts.

| RhB Concentration<br>( mg/L)<br>Sample name | Initial concentration<br>of RhB | After dark<br>adsorption (30<br>min) | After<br>photocatalytic<br>reaction (120 min) |
|---------------------------------------------|---------------------------------|--------------------------------------|-----------------------------------------------|
| bows-like Cu <sub>2</sub> O                 | 10                              | 6.8                                  | 0.05                                          |
| nitrogen-doped anatase TiO <sub>2</sub>     | 10                              | 8.75                                 | 2.75                                          |
| nitrogen-doped Degussa P25                  | 10                              | 8                                    | 3.70                                          |
